# Supplementary material
Source: PubMed Central journal article supplement (PMC6314257)
Supplement: 10.1194_M082198_jlr.M082198-1.pdf [file 10.1194_M082198_jlr.M082198-1.pdf]

**SUPPLEMENT FIGURE S1**

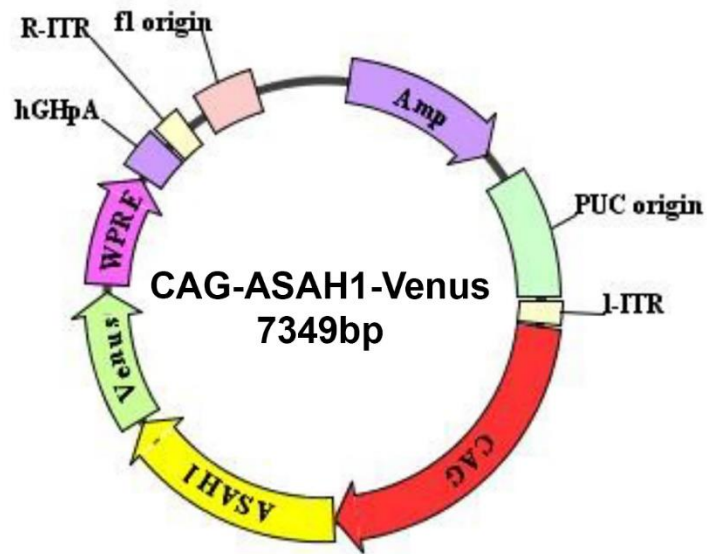

**Supplemental Figure S1. ASAHI Cloning vector.** Human *Acylsphingosine amidohydrolase 1* (ASAHI) cDNA (Genbank Accession No. BC016481.1) was cloned from ARPE19 cells and was fused to the upstream DNA segment encoding the fluorescent protein, Venus. Recombinant plasmids were linearized by restriction digestion and electroporated into ARPE19 cell to generate the stable cell line ARPE19-ASAHI.

SUPPLEMENT FIGURE S2

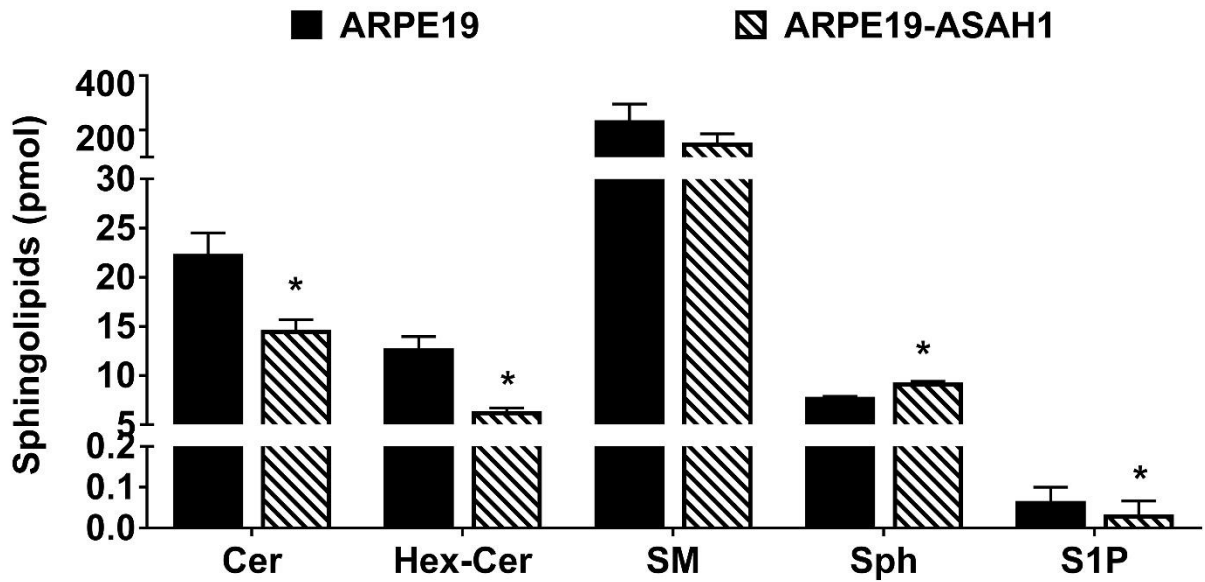

*Supplemental Figure S2. Analysis of major sphingolipids in the media from ARPE19 and ARPE19-ASAHI cells.* ARPE19 and ARPE19-ASAHI cells were grown in serum-free media for 24 hours and 1.5 mL cell-free media was analyzed for sphingolipids. Bar graphs represent mean overall sphingolipid concentrations  $\pm$  SEM. There was significantly less total Ceramide (Cer), Hexosyl-ceramide (Hex-Cer), and Sphingosine 1-phosphate (S1P), but significantly more Sphingosine (Sph) detected in the media from ARPE19-ASAHI cells. There was no change detected in Sphingomyelin (SM) levels. n=4; \*p<0.05.

SUPPLEMENT FIGURE S3

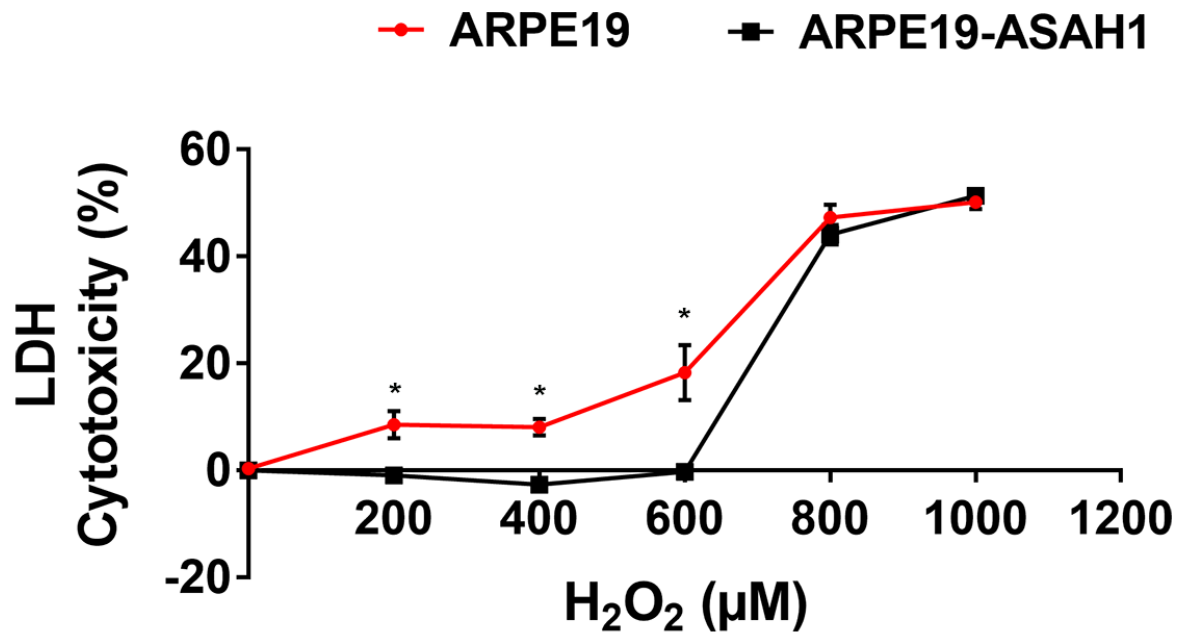

*Supplemental Figure S3. LDH assay for H<sub>2</sub>O<sub>2</sub> cytotoxicity.* ARPE19 and ARPE19-ASAHI cells were treated with varying concentrations of H<sub>2</sub>O<sub>2</sub> and assayed for cytotoxicity. Significant protection is noted at concentrations up to 800 µM H<sub>2</sub>O<sub>2</sub> in ARPE19-ASAHI cells. ARPE19 n=6; ARPE19-ASAHI n=6. \*p<0.05.

SUPPLEMENT FIGURE S4

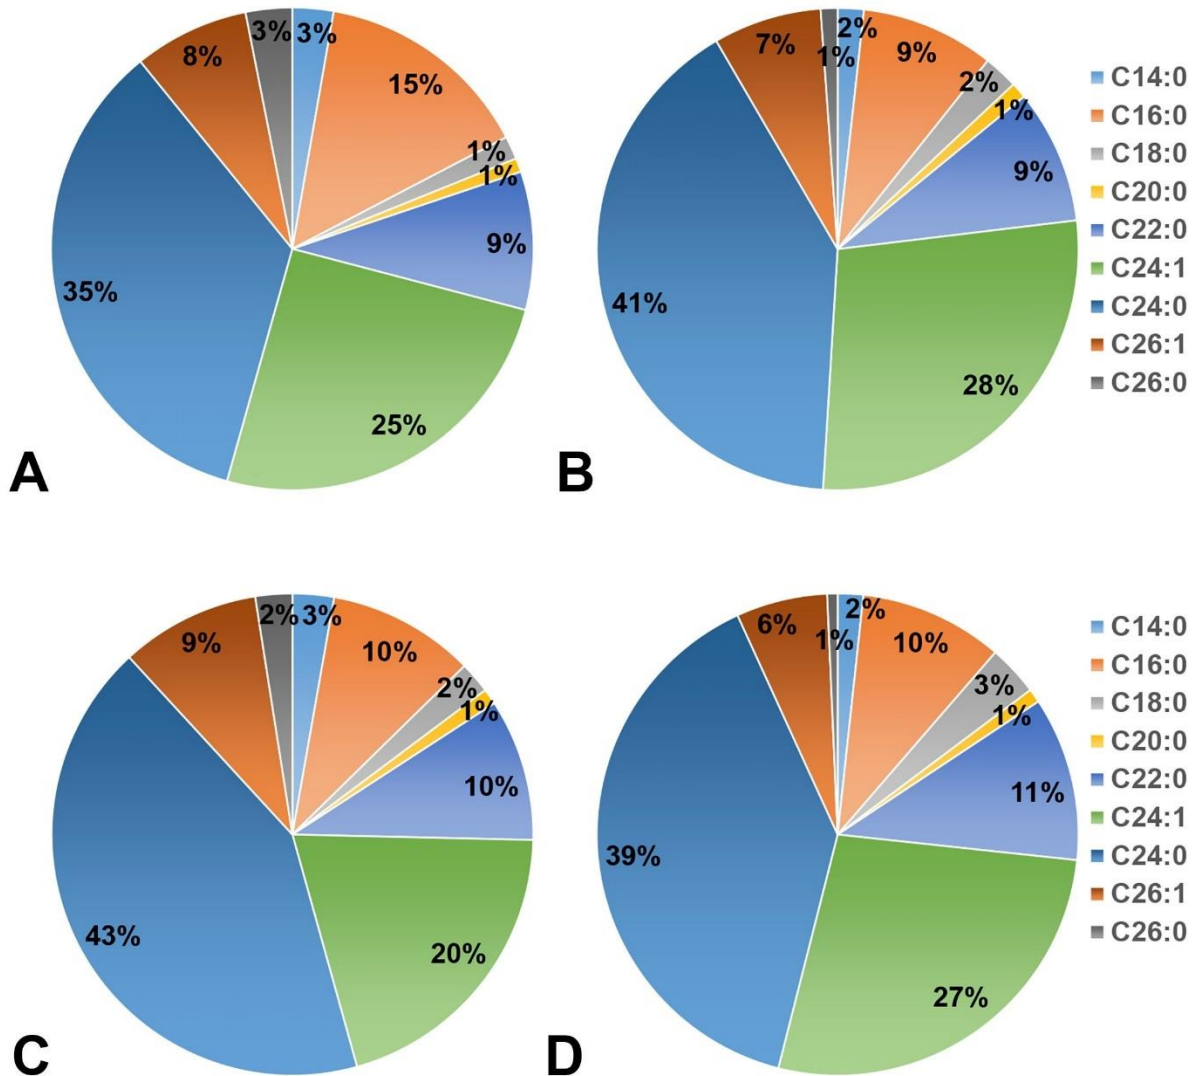

*Supplemental Figure S4. Compositional analysis of Ceramide species.* Samples were processed to collect sphingolipids and analyzed using LC-MS/MS. Ceramide species were quantified with respect to the different chain lengths. Pie charts represent mole percent composition of each lipid species with respect to its own chain length variants within same group. **A)** ARPE19 + Vehicle **B)** ARPE19 + H<sub>2</sub>O<sub>2</sub>. **C)** ARPE19-ASAHI + Vehicle **D)** ARPE19-ASAHI + H<sub>2</sub>O<sub>2</sub>.

SUPPLEMENT FIGURE S5

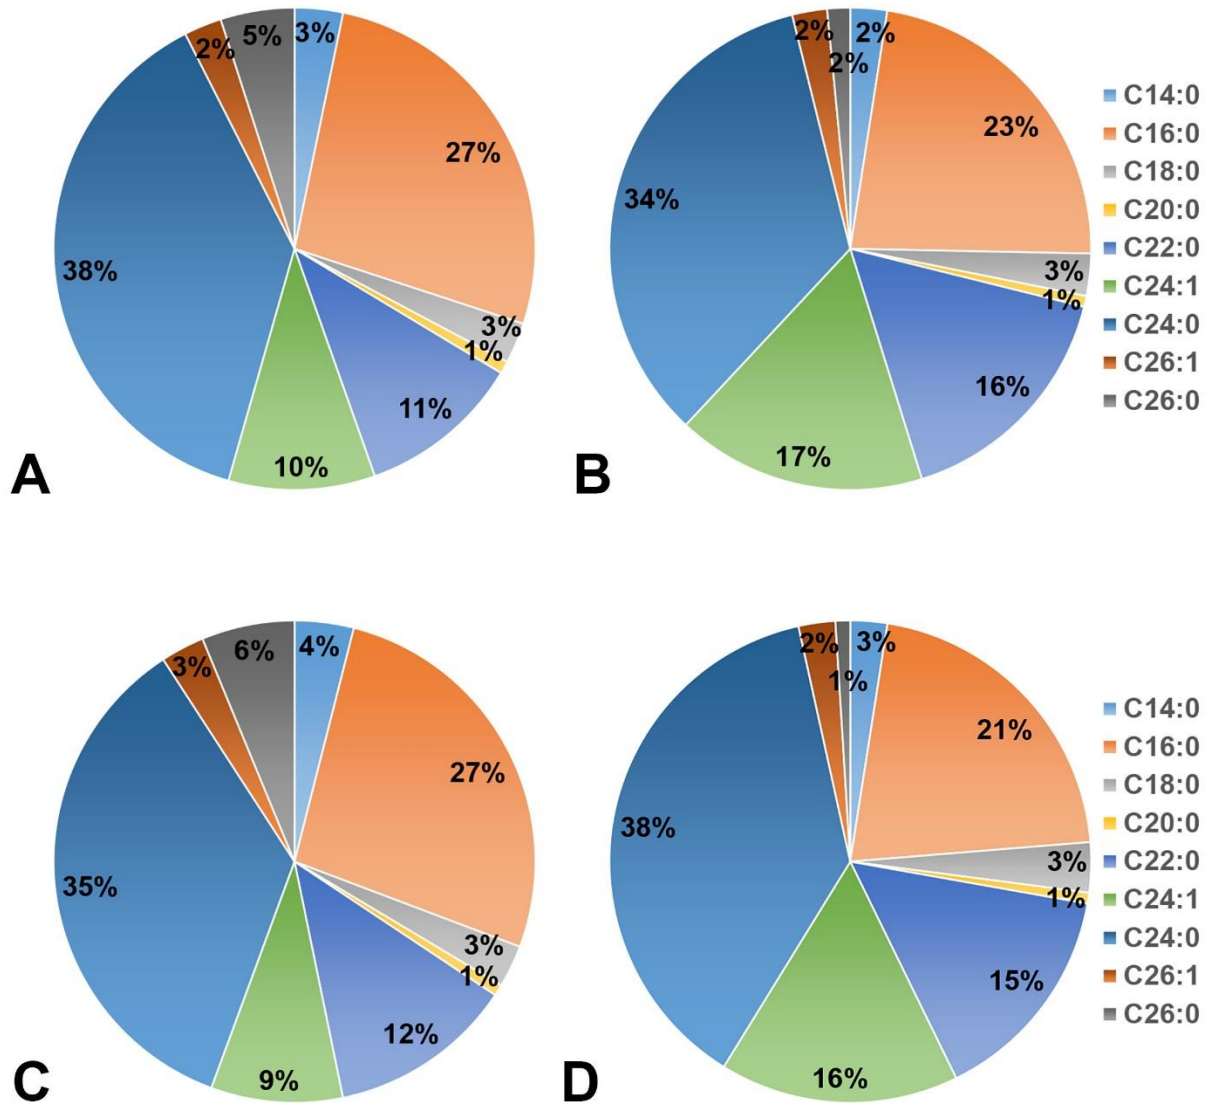

**Supplemental Figure S5. Compositional analysis of Hexosyl-Ceramide species.** Samples were processed to collect sphingolipids and analyzed using LC-MS/MS. Hexosyl-Ceramide species were quantified with respect to the different chain lengths. Pie charts represent mole percent composition of each lipid species with respect to its own chain length variants within same group. **A)** ARPE19 + Vehicle **B)** ARPE19 + H<sub>2</sub>O<sub>2</sub>. **C)** ARPE19-ASAHI + Vehicle **D)** ARPE19-ASAHI + H<sub>2</sub>O<sub>2</sub>.

SUPPLEMENT FIGURE S6

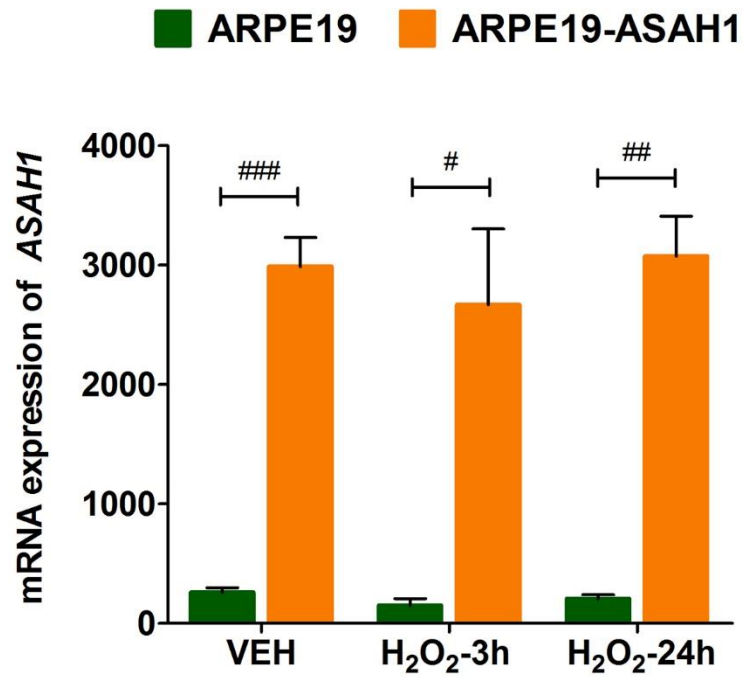

*Supplemental Figure S6.* No change in *ASAHI* mRNA expression within cell types upon H<sub>2</sub>O<sub>2</sub> treatment. There was a significantly greater amount of ASAHI in the transfected cell line compared to ARPE19. Overall, no changes with H<sub>2</sub>O<sub>2</sub> administration were seen in the transgene expression. #p<0.05; ##p<0.01; ###p<0.001.
